# Supplementary material for: Small GTPase patterning: How to stabilise cluster coexistence
Source: PubMed Central journal article supplement (PMC6405054; doi:10.1371/journal.pone.0213188), 2019-03-07

# WP model

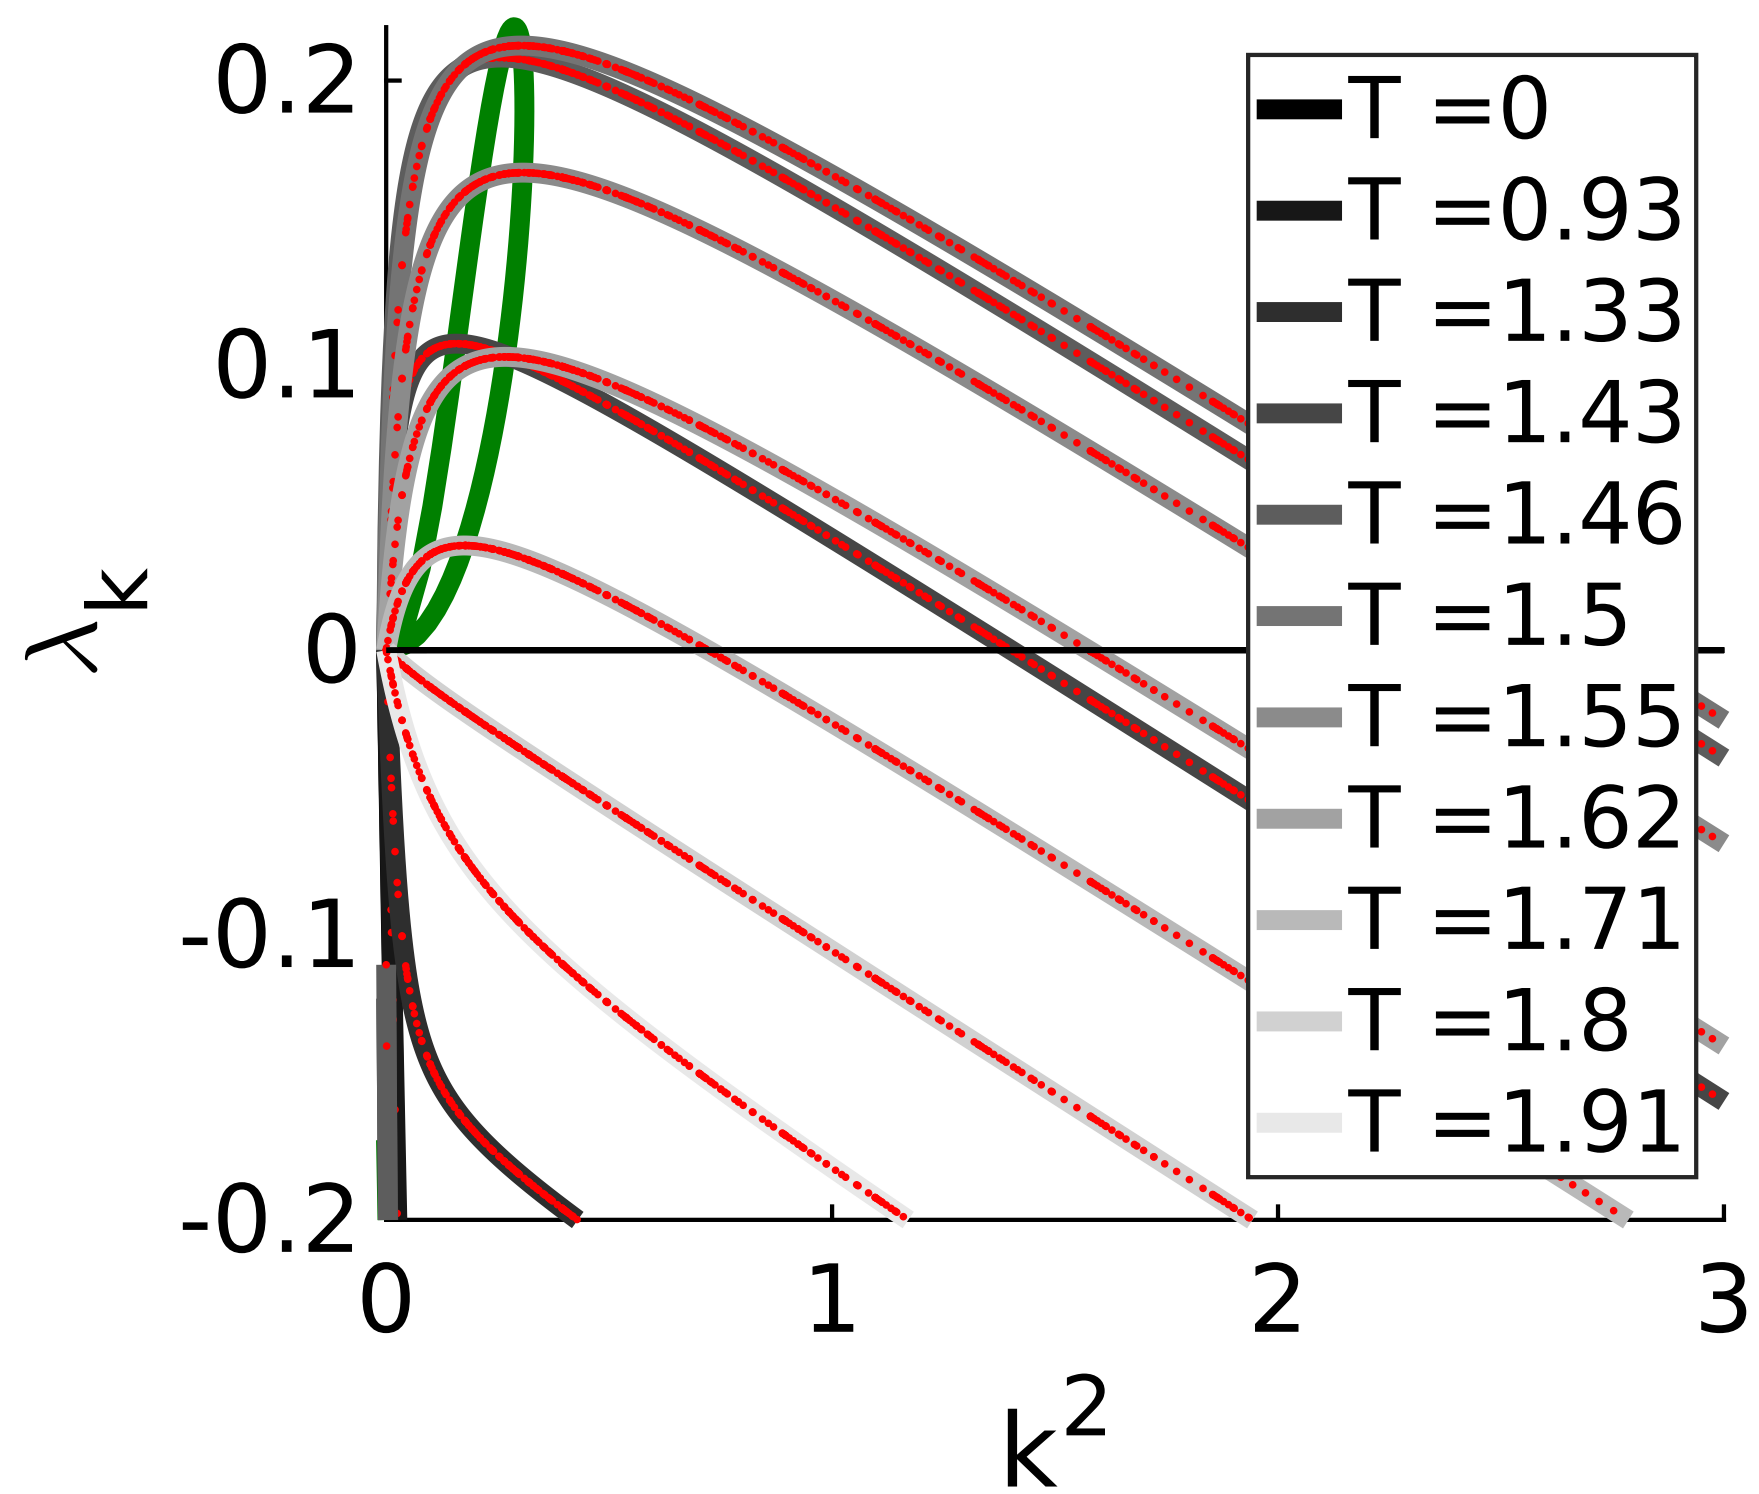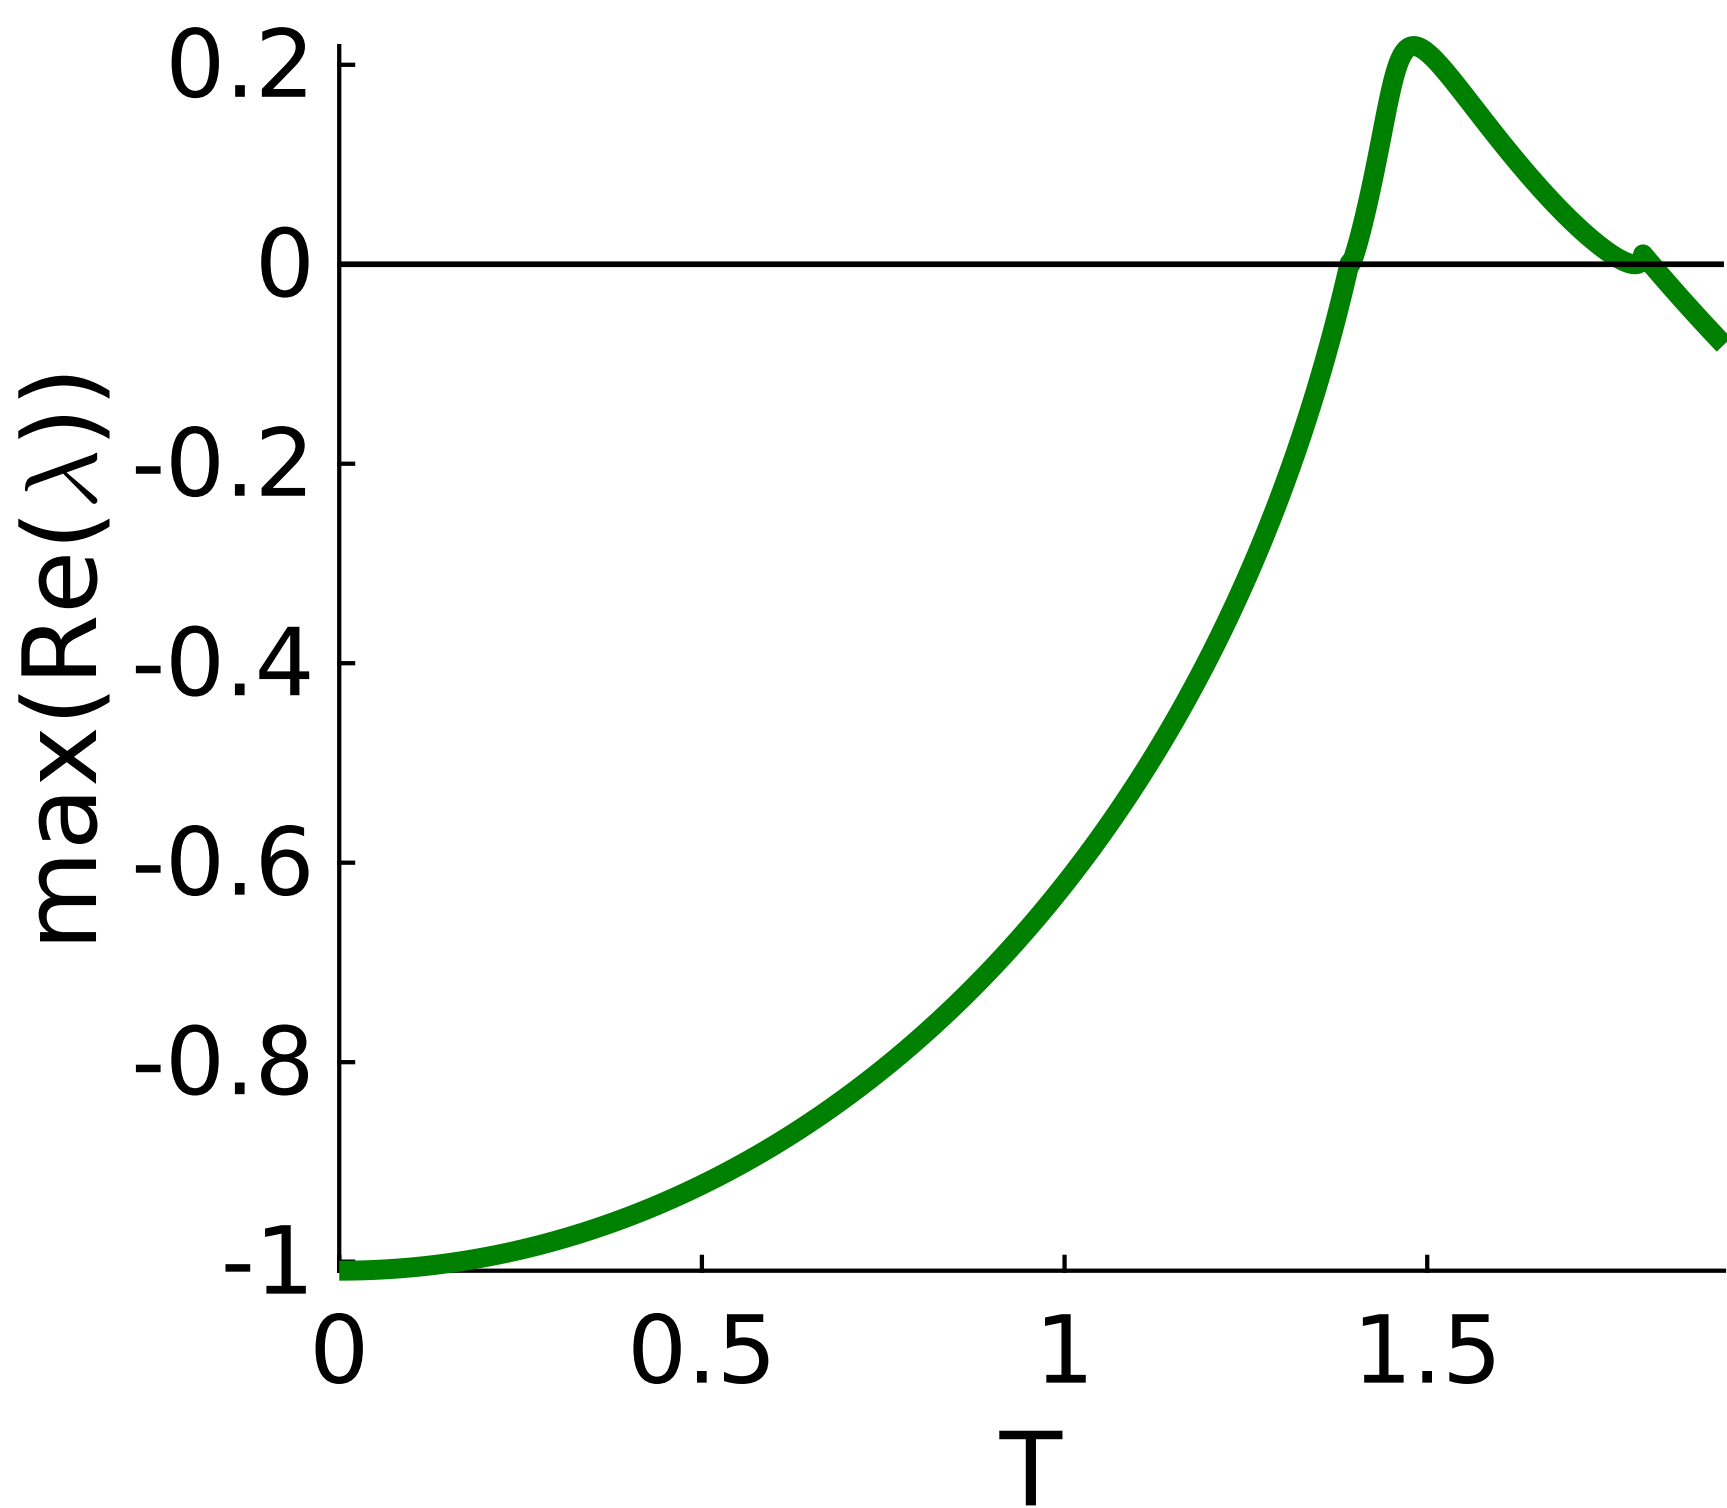

# WPT model

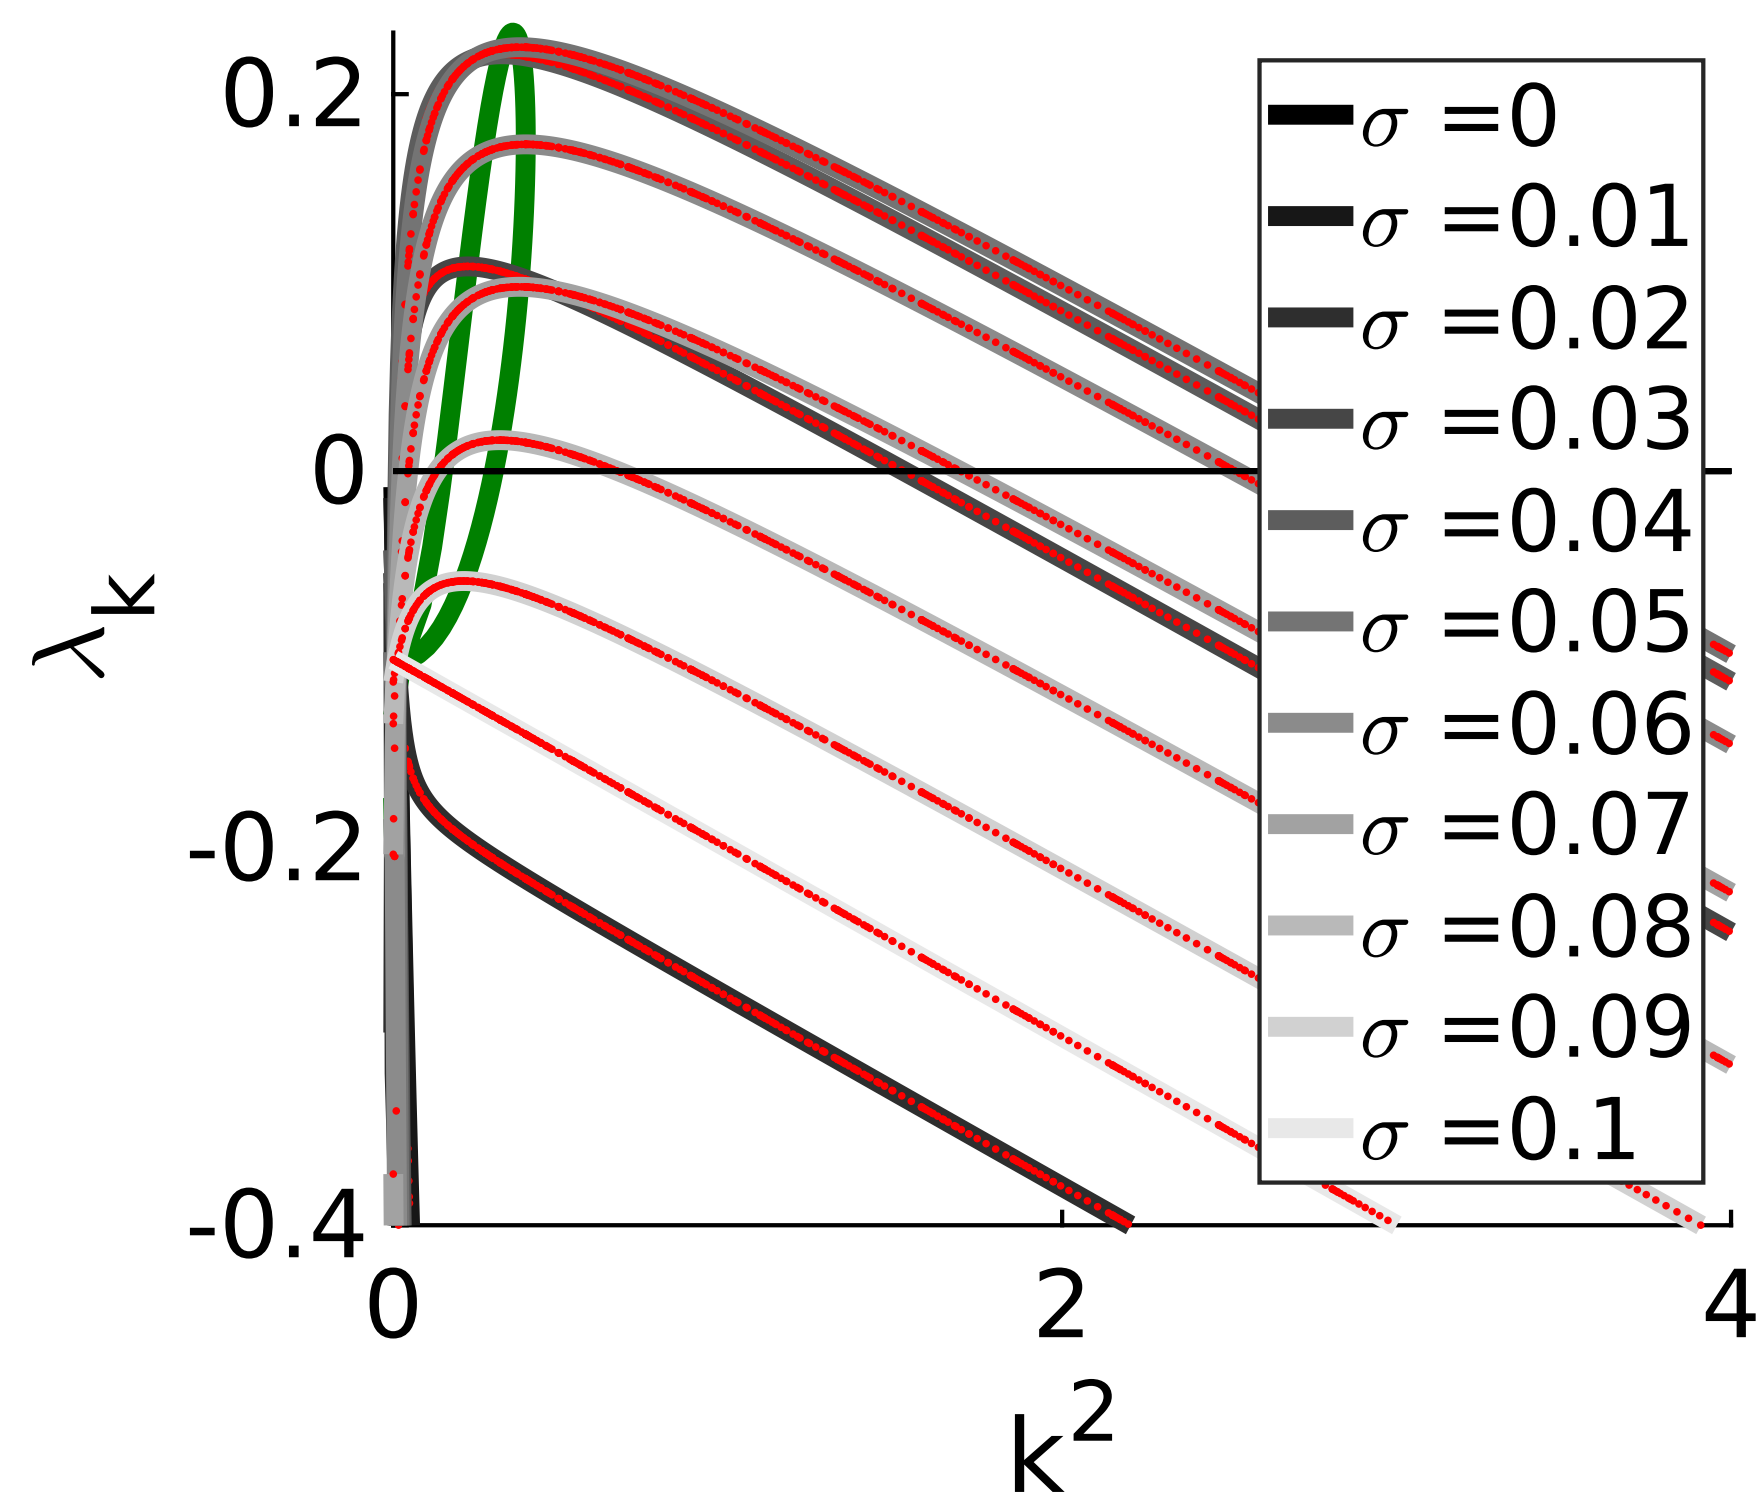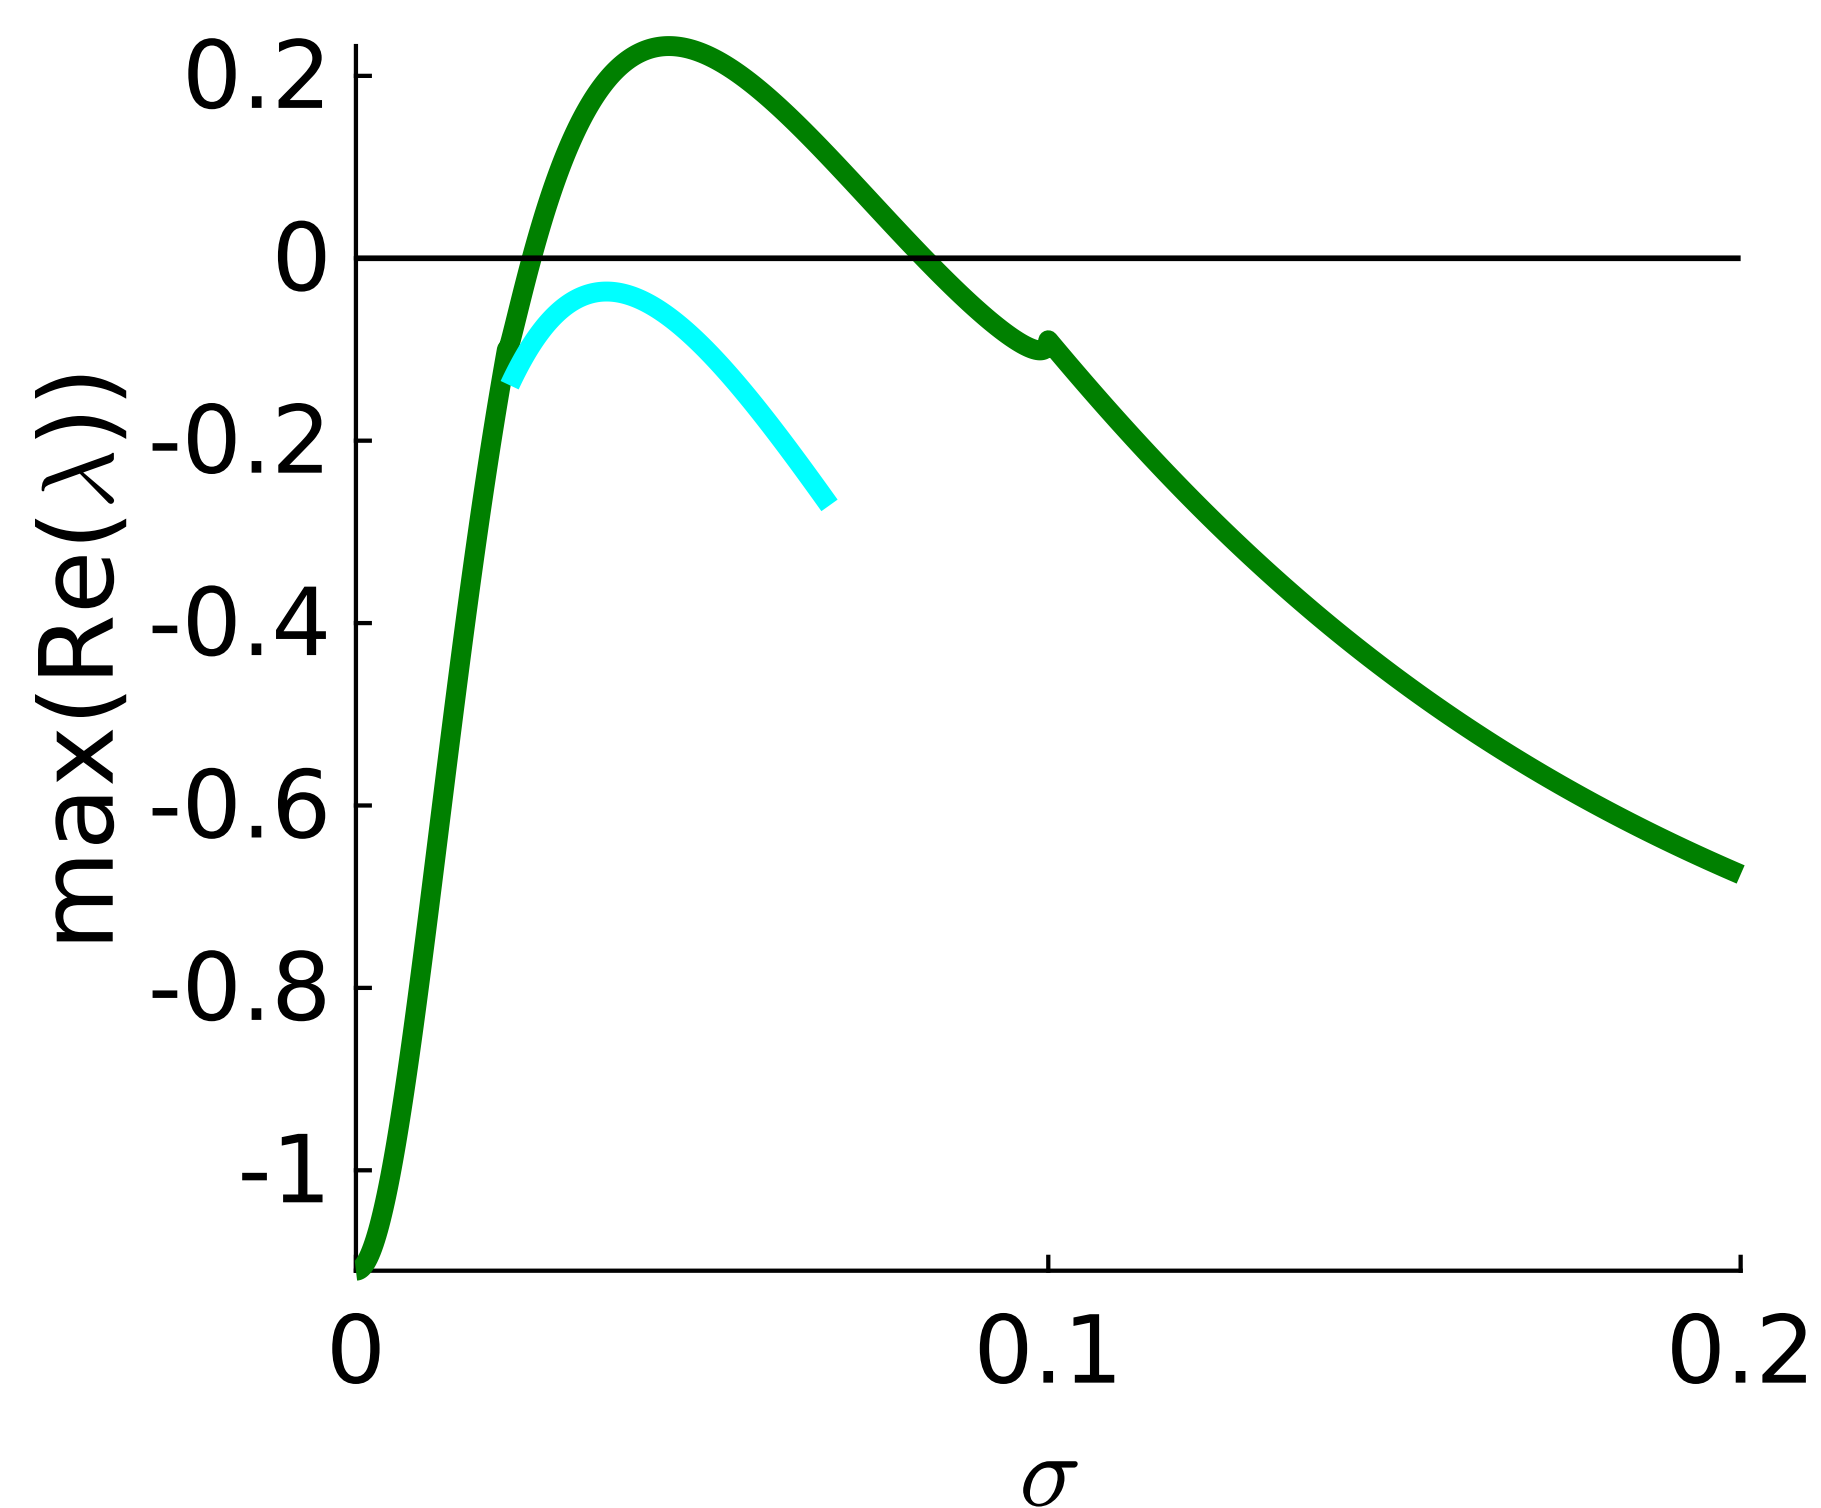

Supplement: pone.0213188.s003.pdf [file pone.0213188.s003.pdf]
