# Supplementary material for: Small GTPase patterning: How to stabilise cluster coexistence
Source: PubMed Central journal article supplement (PMC6405054; doi:10.1371/journal.pone.0213188), 2019-03-07

Factor 10  
reduction

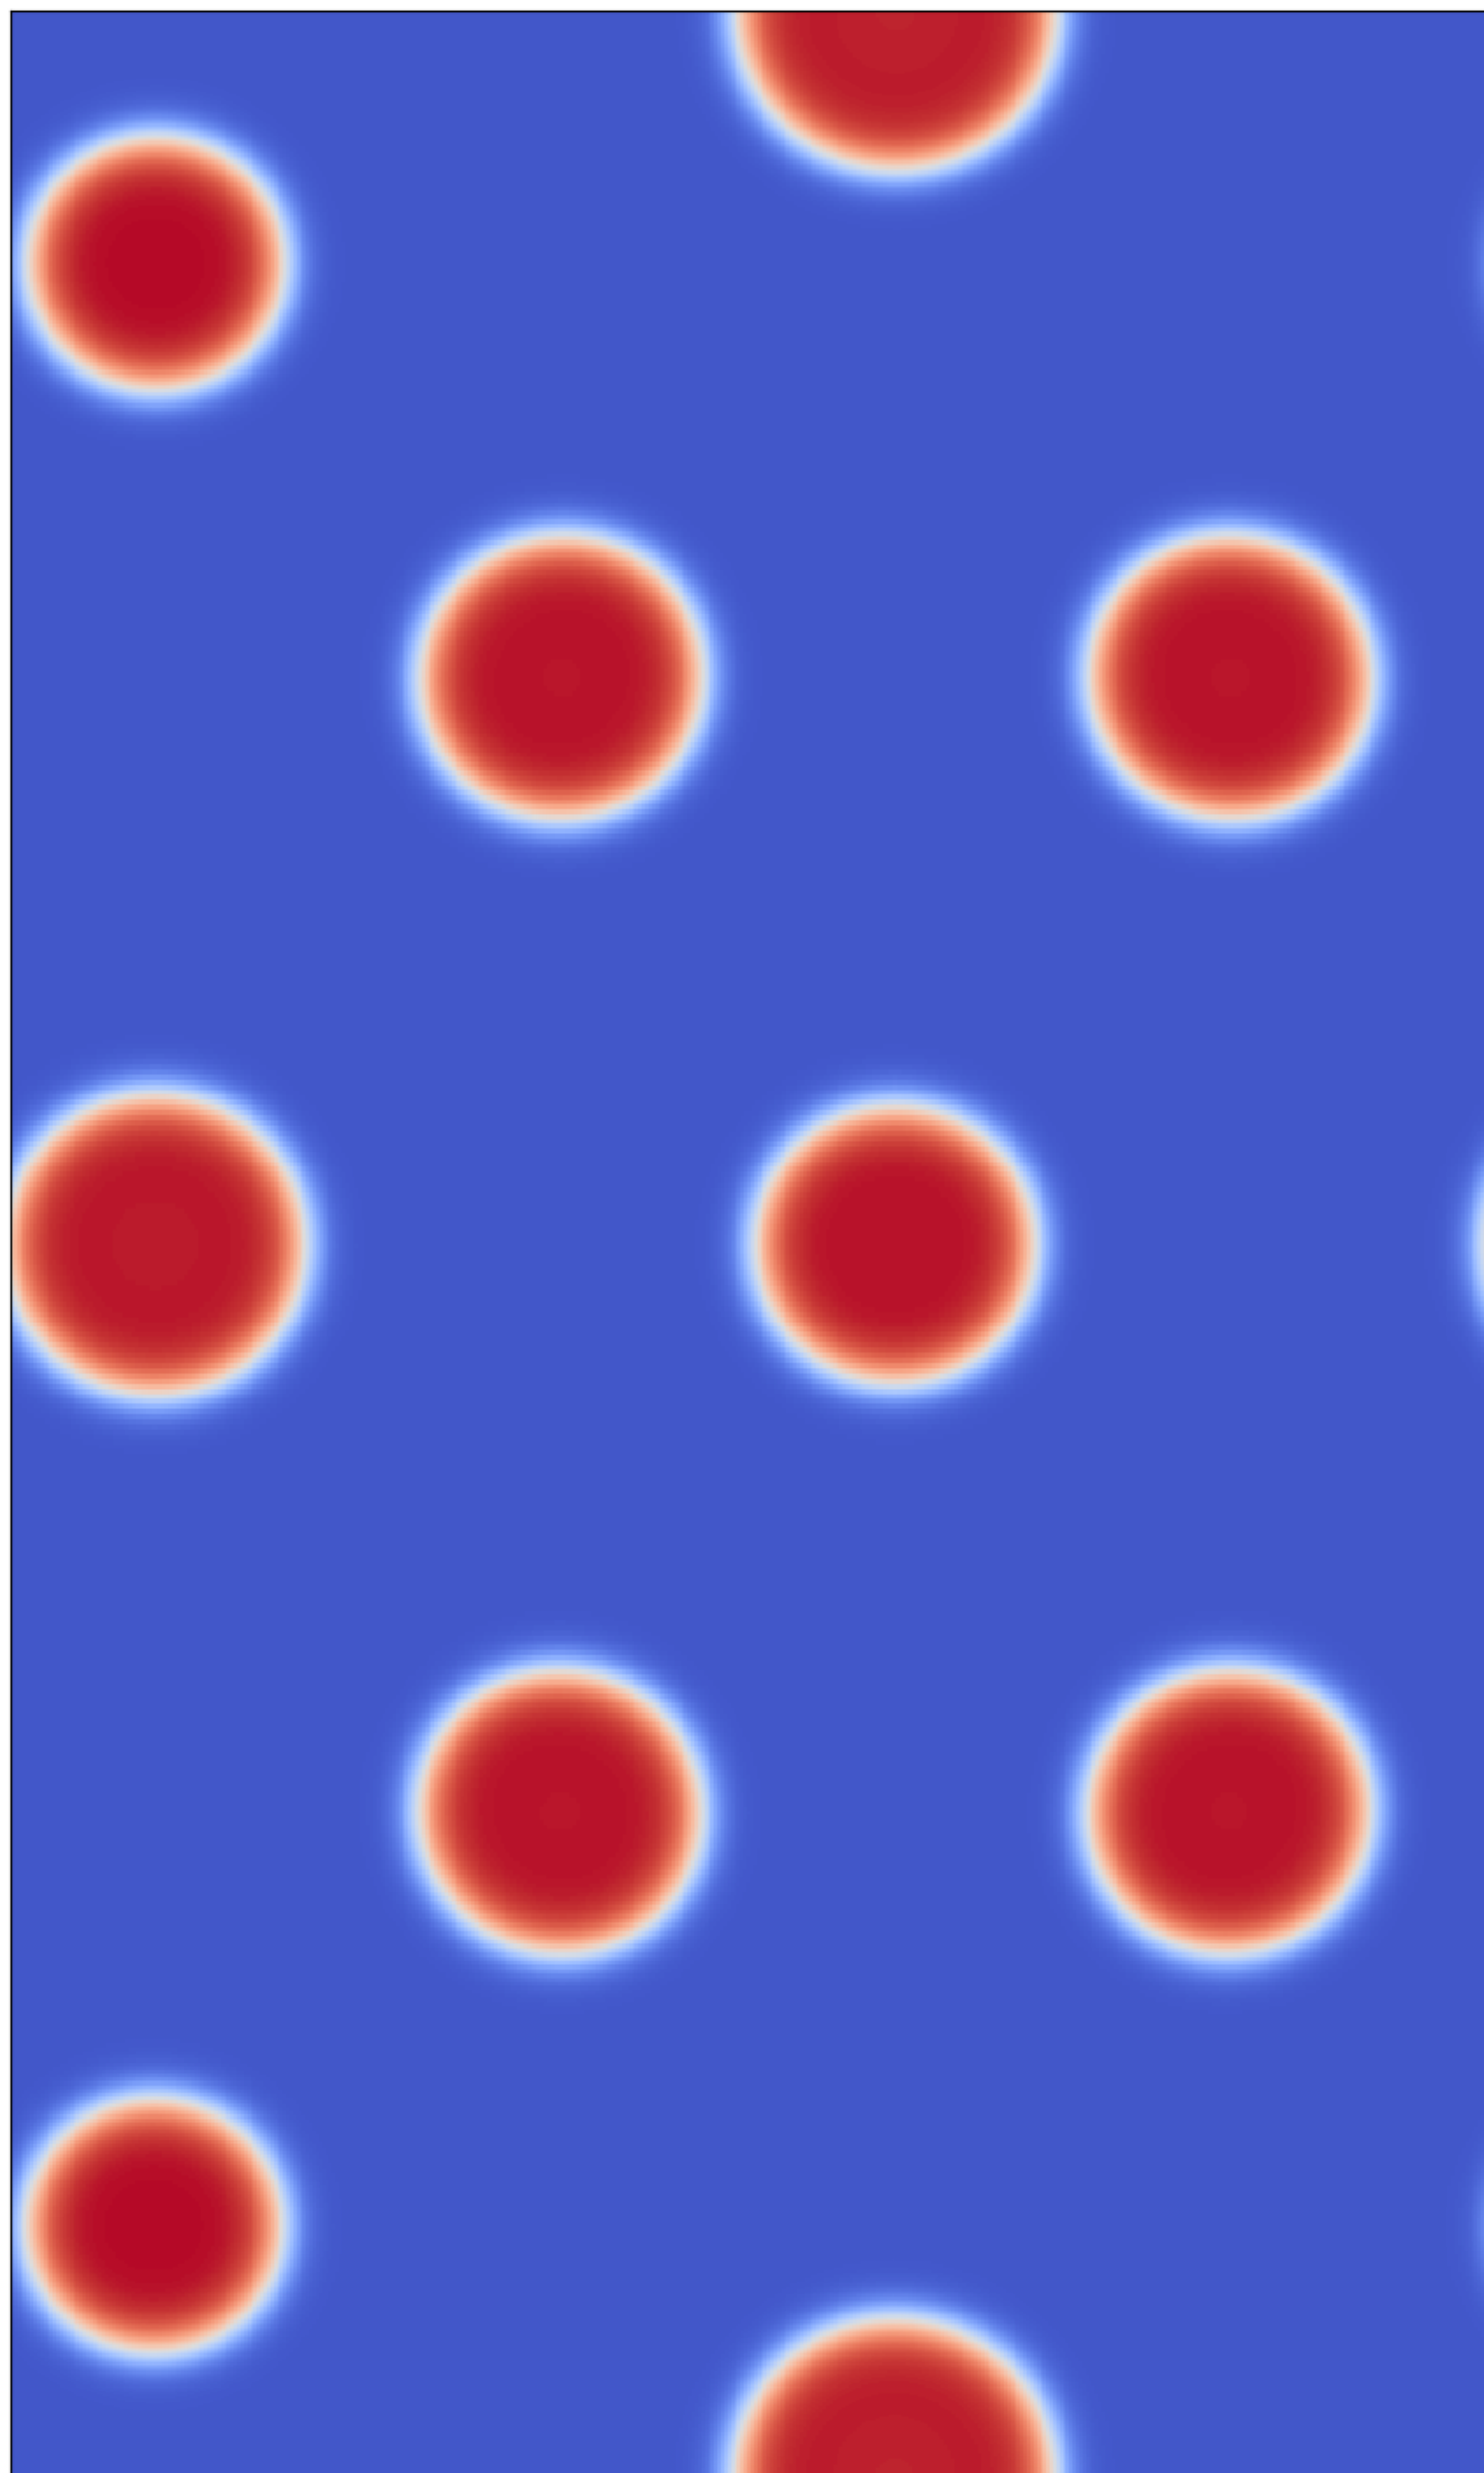

Factor 100  
reduction

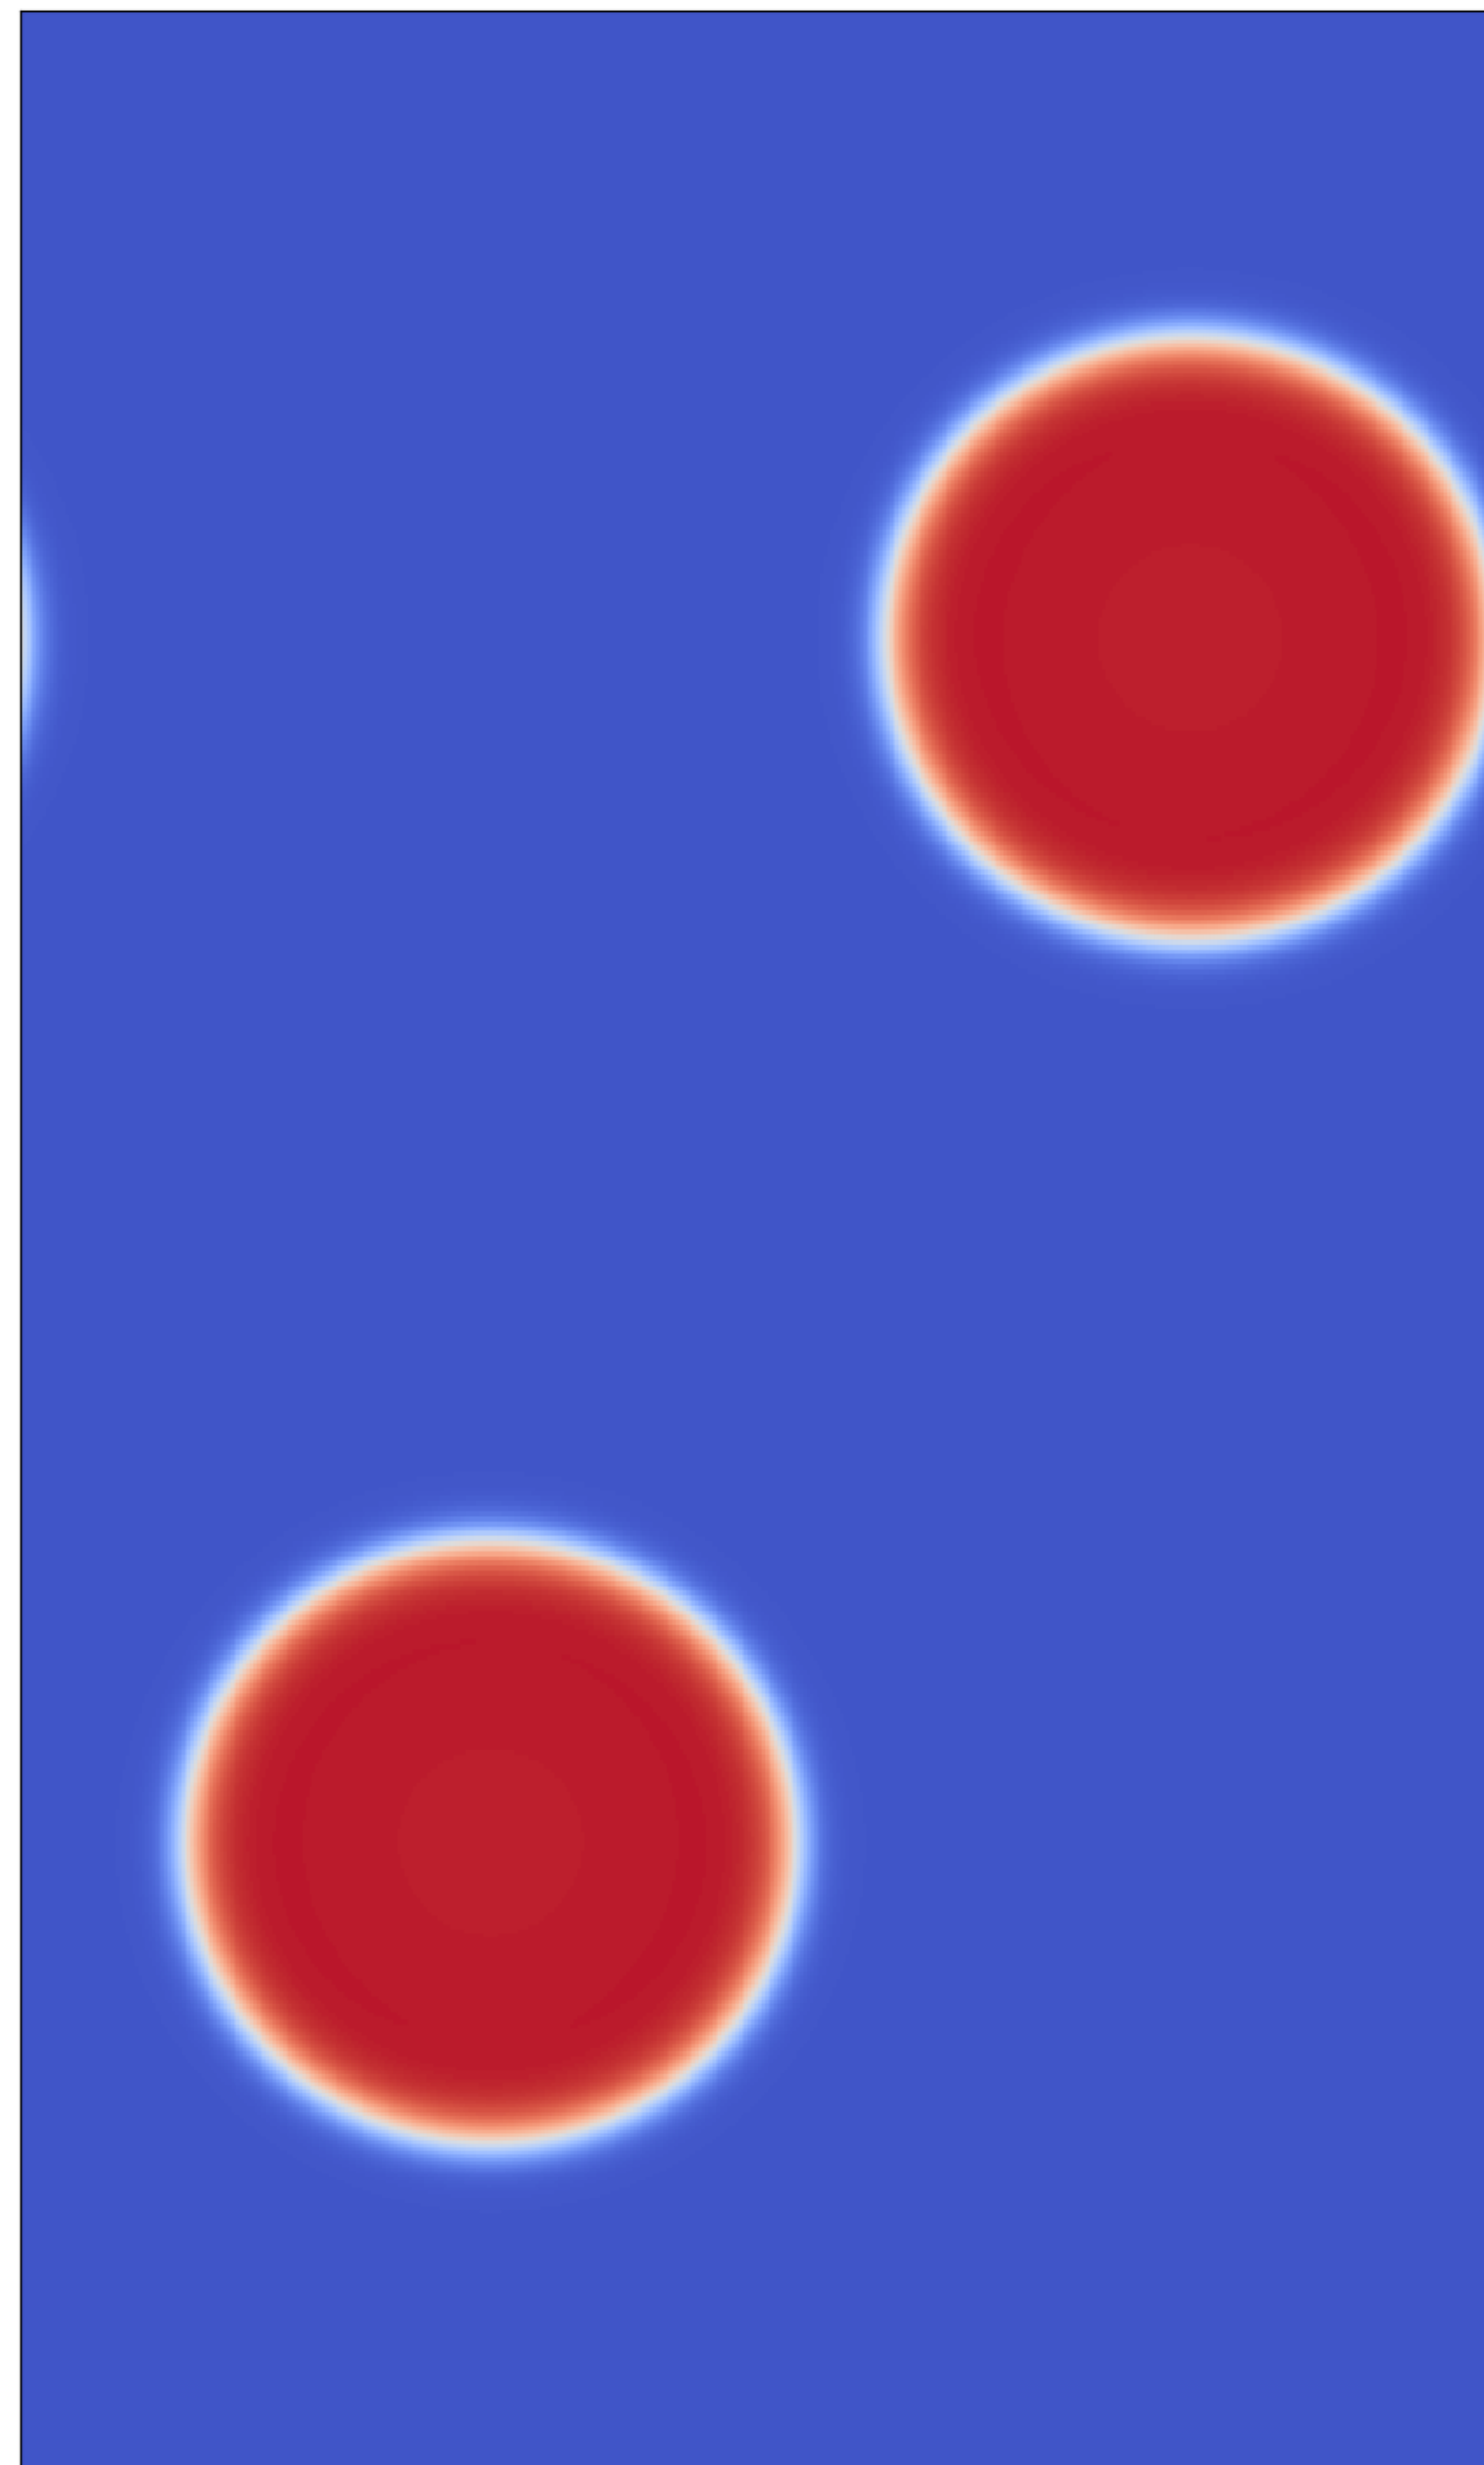

Factor 1000  
reduction

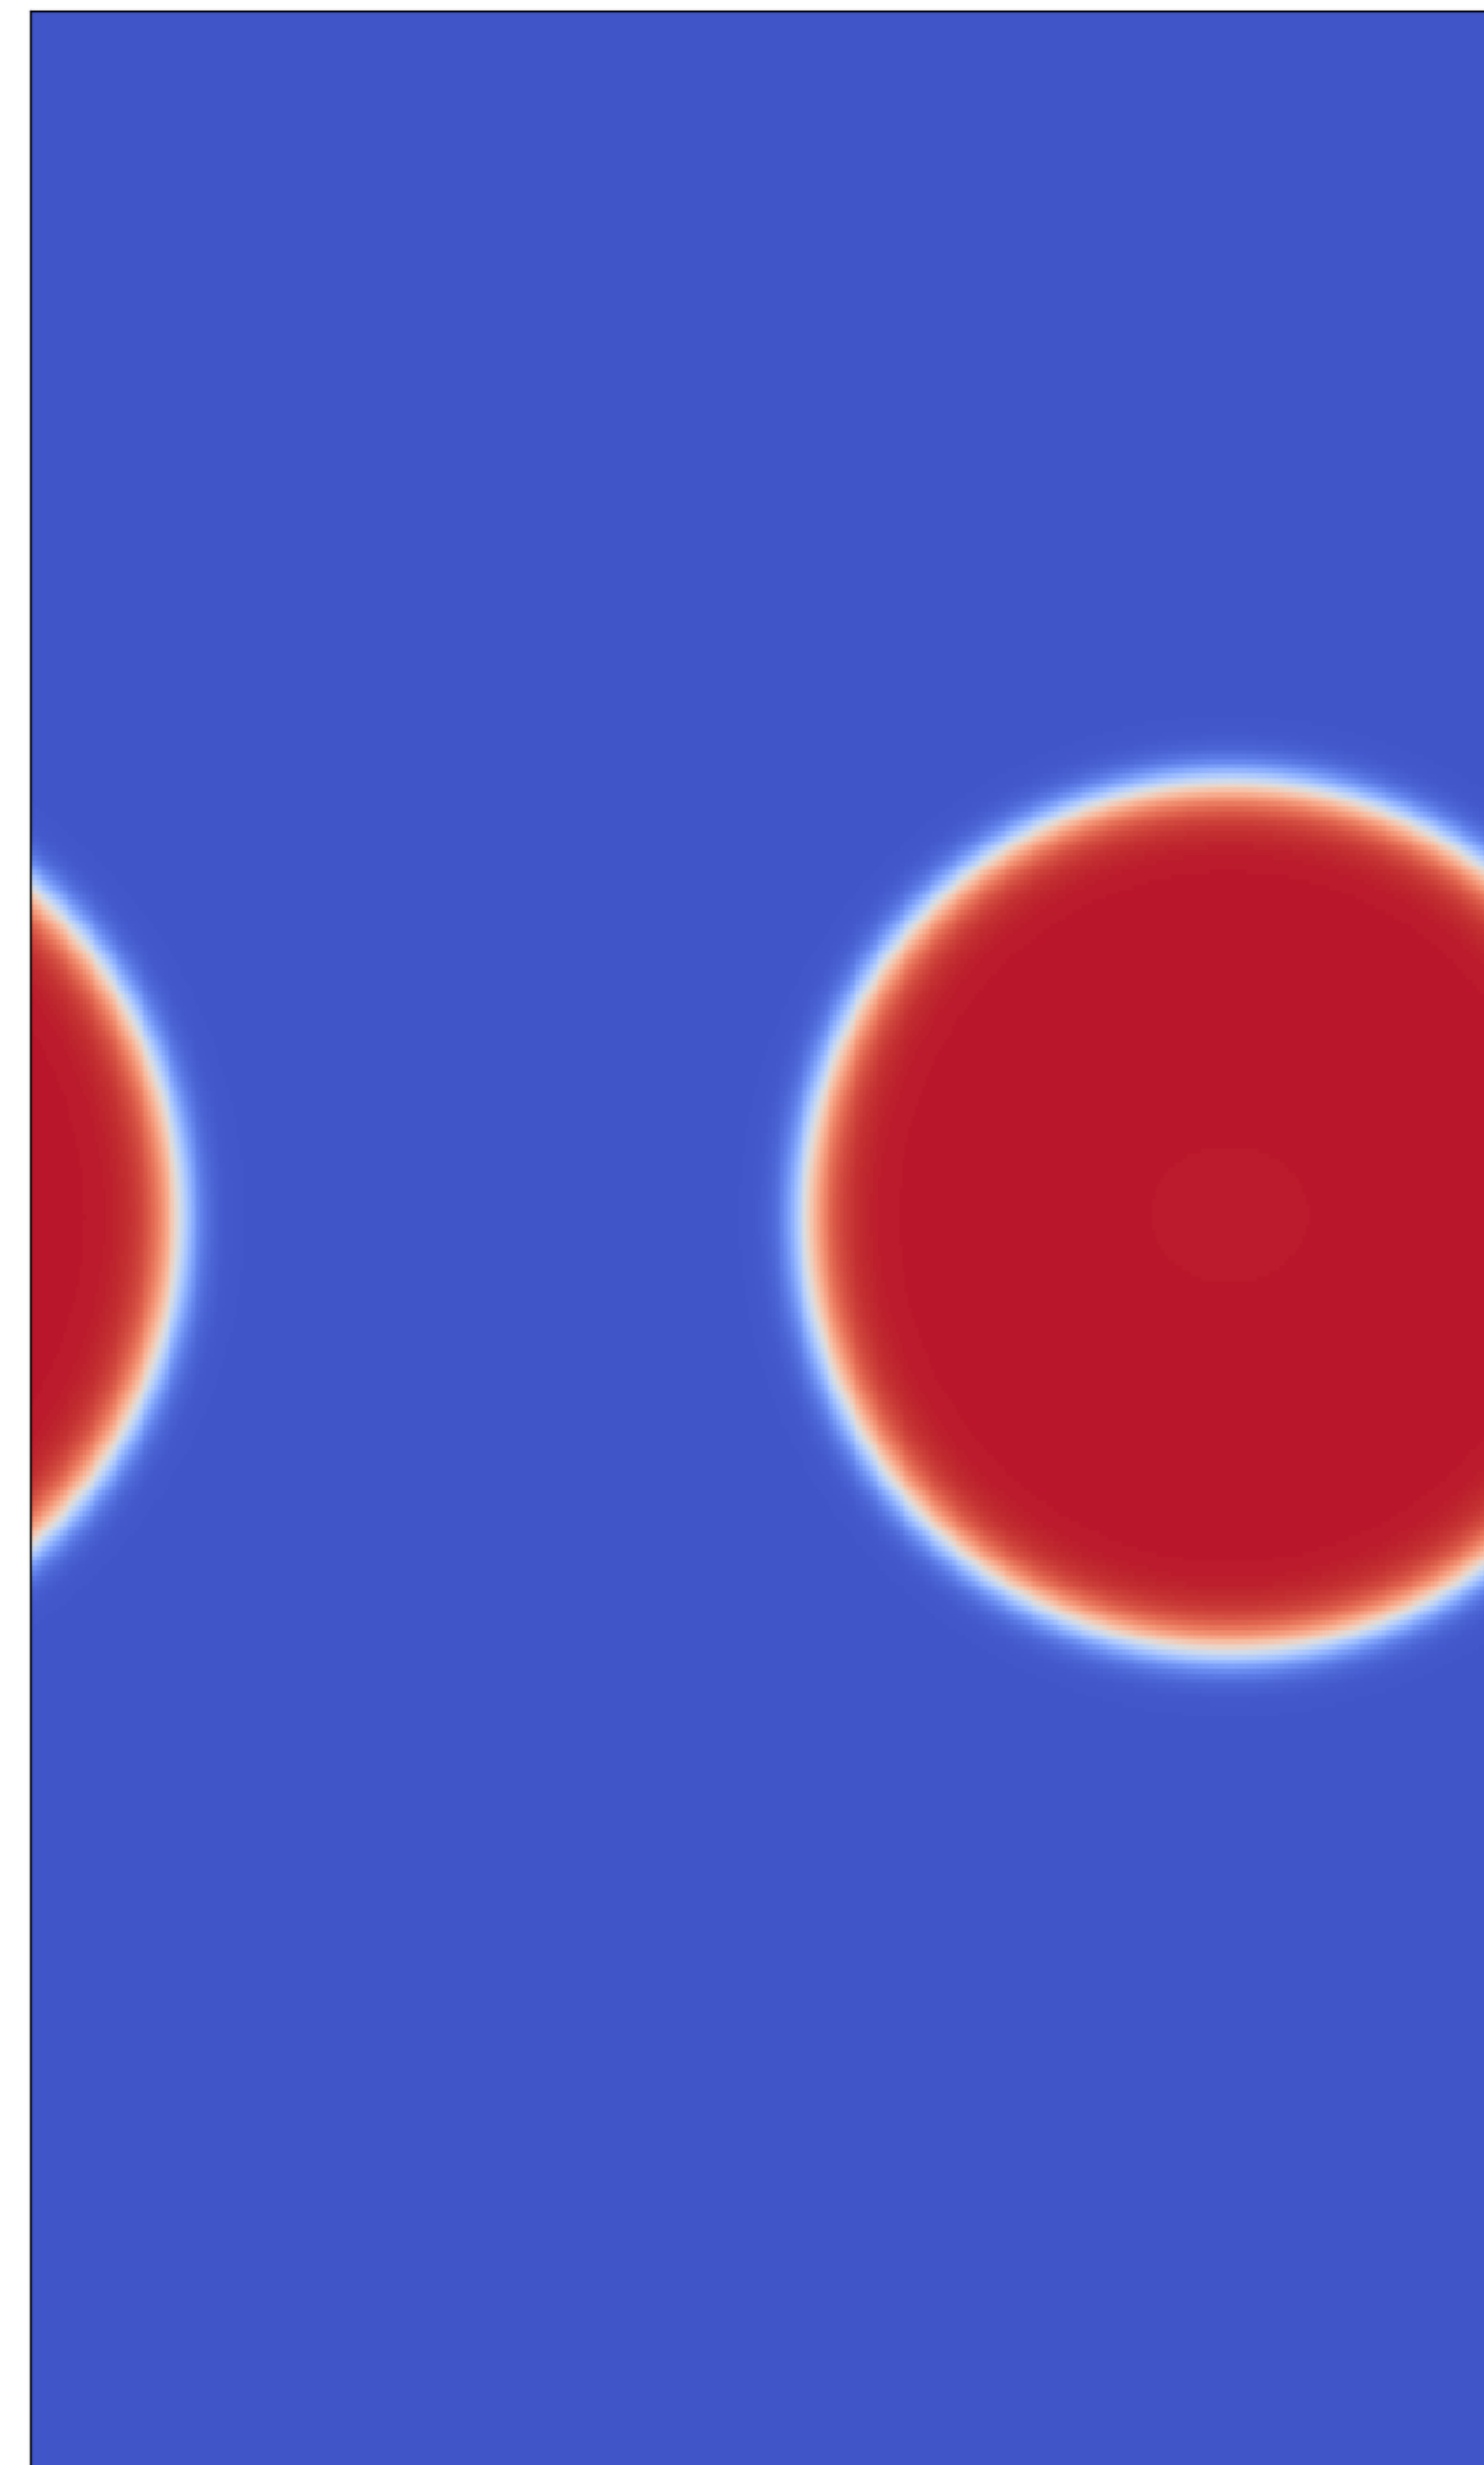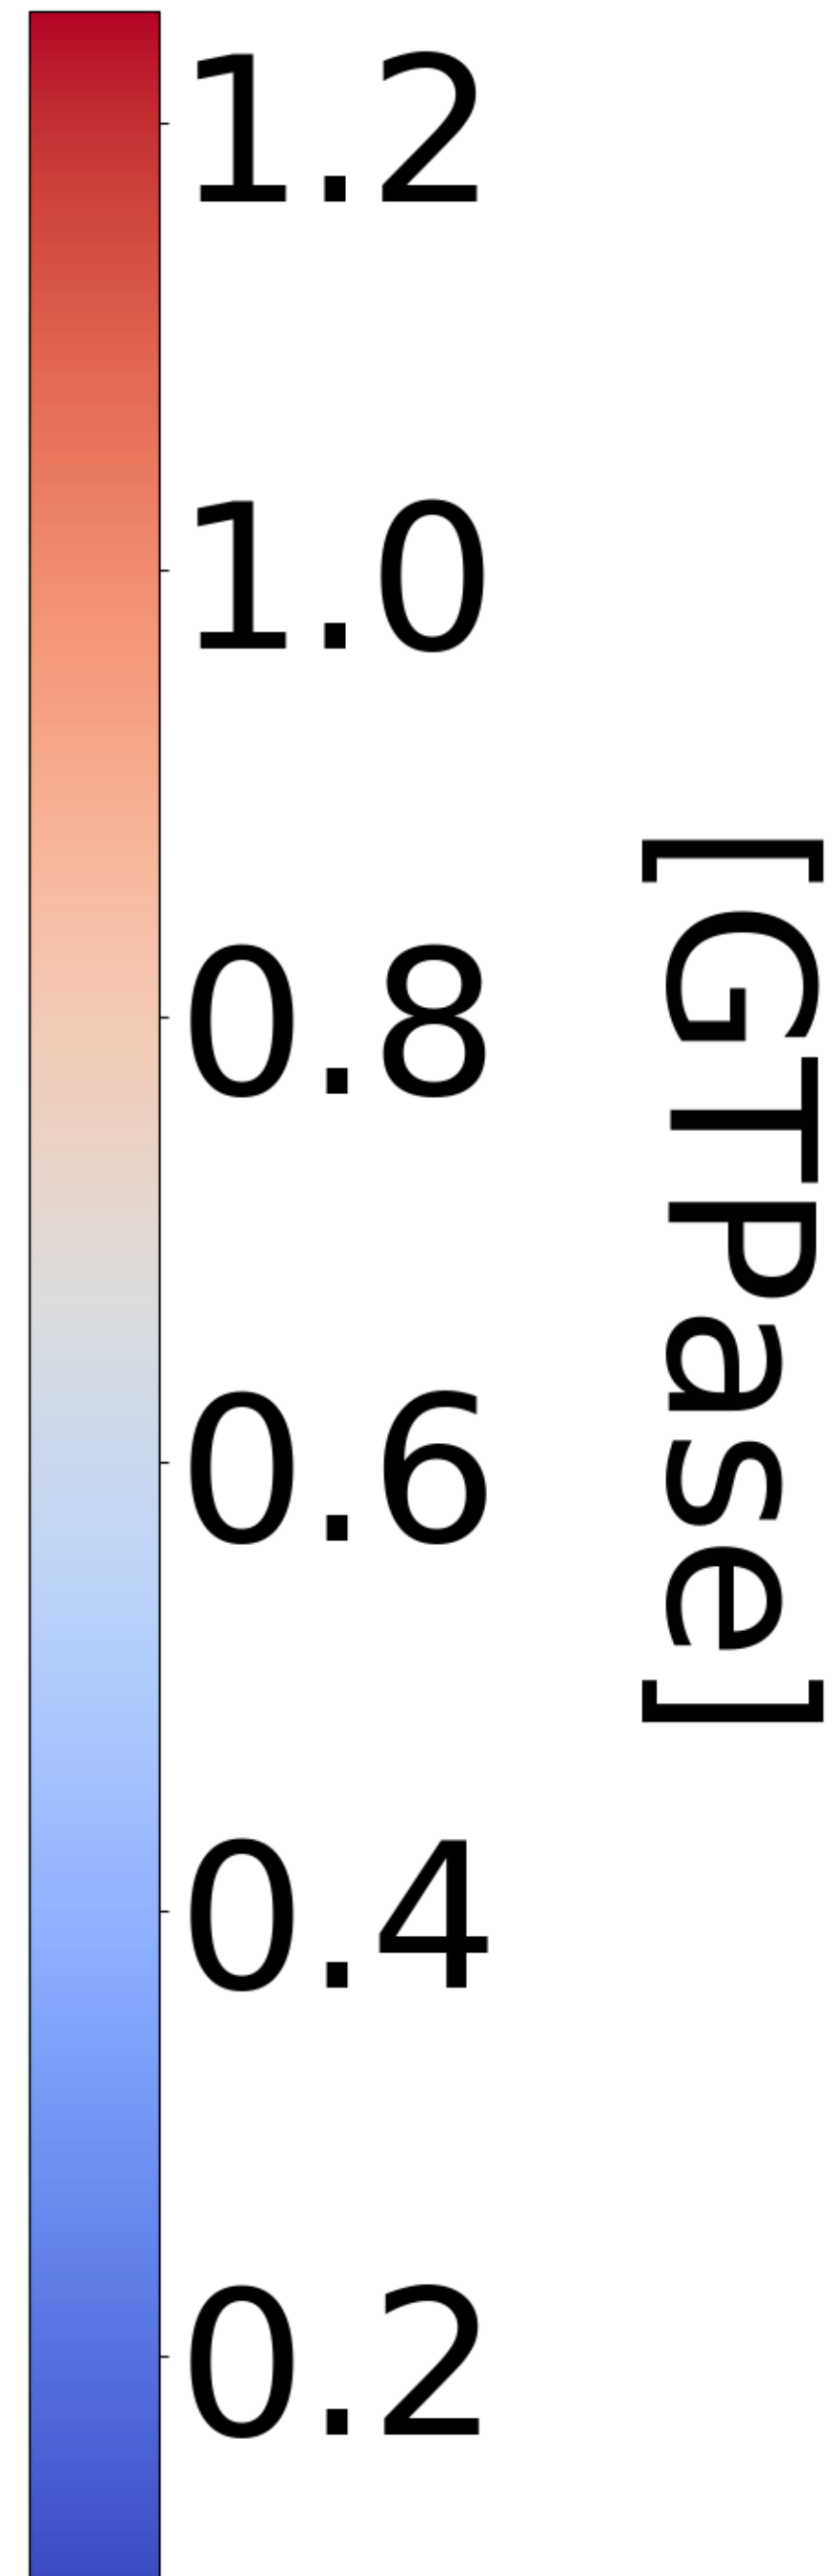

Supplement: pone.0213188.s004.pdf [file pone.0213188.s004.pdf]
