# Supplementary material for: Small GTPase patterning: How to stabilise cluster coexistence
Source: PubMed Central journal article supplement (PMC6405054; doi:10.1371/journal.pone.0213188), 2019-03-07
Supplement: pone.0213188.s007.pdf [file pone.0213188.s007.pdf]

| Model                  | dx = dy | dt   |
|------------------------|---------|------|
| WP                     | 0.2     | 0.5  |
| MI                     | 0.25    | 0.2  |
| WPT                    | 0.2     | 0.5  |
| MIT                    | 0.2     | 0.2  |
| WPGAP, $D_G = 100$     | 0.25    | 0.2  |
| WPGAP, $D_G = 40$      | 0.2     | 0.1  |
| MIGAP1                 | 0.25    | 0.2  |
| MIGAP2                 | 0.25    | 0.1  |
| Tip growth simulations | 0.05    | 0.05 |
